# Supplementary material for: Do Hemodynamic and Echocardiographic Derangements after the Fontan Operation Correlate with Severity of Liver Disease on Biopsy?
Source: Research Square preprint supplement (doi:10.21203/rs.3.rs-6305962/v1), 2025-04-16
Supplement: Supplementary file 1 [file dca13883095963135521a470.docx]

**Tables**

**Table 1:** Congestive Hepatic Fibrosis Score (CHFS).

| Score | Liver fibrosis staging |
| --- | --- |
| 0 | Liver congestion with no fibrosis |
| 1 | Central zone fibrosis |
| 2A | Central zone and mild portal fibrosis, with accentuation  at central zone |
| 2B | At least moderate portal fibrosis and central zone fibrosis,  with accentuation at the portal zone |
| 3 | Bridging fibrosis |
| 4 | Cirrhosis |

**Table 2**: Demographics

| Variable | n=120 (%) |
| --- | --- |
| Male, n (%)  White, n (%)  Median Age at liver biopsy, years [IQR] | 70 (58.3)  102 (85.0)  27 [21, 33] |
| Physiology, n (%)  Single left ventricle  Single right ventricle | 73 (60.8)  47 (39.2) |
| Primary diagnosis, n (%)  Tricuspid atresia  DILV  HLHS  UAVSD  Other complex anatomy  DORV  PA/IVS  Congenitally corrected TGA | 35 (29.2)  28 (23.3)  23 (19.1)  9 (7.5)  9 (7.5)  7 (5.8)  6 (5)  3 (2.5) |
| Heterotaxy, n (%)  No  Right atrial isomerism  Left atrial isomerism | 106 (88.3)  9 (7.5)  5 (4.2%) |
| Type of Fontan, n (%)  Extracardiac  Lateral tunnel  Atriopulmonary connection | 49 (40.8)  48 (40.0)  23 (19.2) |
| Fenestration, n (%)  No  Yes  Currently patent  Spontaneously closed/not well seen  Closed by intervention | 59 (49.2)  61 (50.8)  20 (32.8)  8 (13.1)  33 (54.1) |
| Fontan-related comorbidities, n (%)  Atrial arrhythmias  Thrombocytopenia  Esophageal varices  Serious thromboembolic event  Protein losing enteropathy  Atrioventricular block  Pacemaker  Sinus node dysfunction  Plastic bronchitis  Ventricular arrhythmias | 72 (71.3)  19 (18.8)  9 (8.9)  15 (14.9)  14 (13.9)  4 (4.0)  28 (27.7)  9 (8.9)  2 (2.0)  7 (6.9) |
| Transplant, n (%)  Isolated heart  Combined heart/liver | 20 (16.6)  6 (5) |

DILV: double inlet left ventricle, DORV: double outlet right ventricle, , HLHS: hypoplastic left heart syndrome, PA/IVS: pulmonary atresia intact ventricular septum, TGA: transposition of great arteries. UAVSD: unbalanced atrioventricular septal defect.

**Table 3:** Liver biopsy results.

| Congestive Hepatic Fibrosis Score | n=154 (%) |
| --- | --- |
| 0 No fibrosis  1 Central zone fibrosis  2A Central zone and mild portal fibrosis  2B At least moderate portal fibrosis  3 Bridging fibrosis  4 Cirrhosis | 6 (3.9)  34 (22.1)  28 (18.2)  13 (8.4)  48 (31.2)  24 (15.6) |
| Hepatocellular carcinoma | 1 (0.6%) |
